## Left ventricular stiffness assessed by diastolic wall strain predicts asymptomatic atrial high rate episodes in patients with pacemaker implantation

H. Kishima, T. Mine, E. Fukuhara, M. Ishihara

Hyogo College of Medicine, Nishinomiya, Japan

**Funding Acknowledgement:** Type of funding source: None

**Background:** Asymptomatic atrial fibrillation has been reported to be associated with an increased risk of embolism.

**Purpose:** We investigated whether the left ventricular (LV) stiffness assessed by diastolic wall strain (DWS) predicts atrial high rate episodes (AHREs) in patients with pacemaker implantation (PMI).

**Methods:** One hundred forty seven patients (76 males, 75.2±8.9 years, 62 with sick sinus syndrome; SSS and 85 with atrioventricular block) who did not show atrial tachyarrhythmia before PMI were studied. DWS and other measurements were assessed using transthoracic echocardiography before DDD-pacemaker implantation. DWS was calculated from the M-mode echocardiographic measurement of the LV posterior wall thickness at end-systole (PWs) and end-diastole (PWd), and DWS was defined as (PWs-PWd)/PWs.

**Results:** AHREs (>5 min and >180 beats/min) were detected in 50/147 patients during follow-up periods (38.3±13.8 months). Patients with AHREs showed reduced DWS (0.29±0.07 vs. 0.39±0.06,  $p<0.0001$ ), larger left atrial volume index, elevated E/e' ratio, thicker LV PWd, higher prevalence of SSS, and left bundle branch block pattern during ventricular pacing. On multivariate analysis, DWS was only independently associated with AHREs ( $p<0.0001$ , HR 1.987 for each 0.1 decrease in DWS, 95% CI 1.553–2.650). Patients with reduced DWS (<0.33) had a higher risk of incidences of AHREs (Figure 1).

**Conclusions:** LV stiffness assessed by DWS predicts AHREs in patients with PMI.

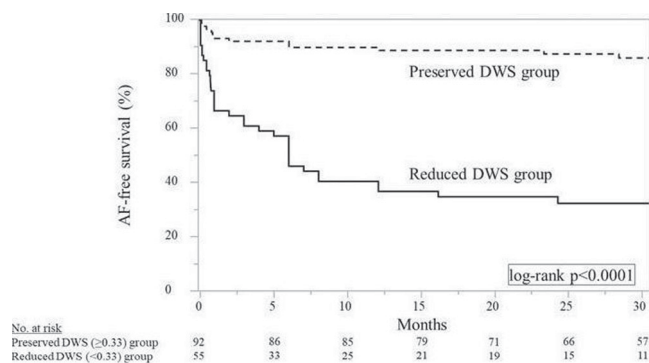

Figure 1
